# Supplementary material for: Health Information Technology to Facilitate Communication Involving Health Care Providers, Caregivers, and Pediatric Patients: A Scoping Review
Source: J Med Internet Res. 2010 Jun 18;12(2):e22. doi: 10.2196/jmir.1390 (PMC2956233; doi:10.2196/jmir.1390)
Supplement: Supplementary file 1 [file jmir_v12i2e22_app1.pdf]

## Multimedia Appendix

### Database Searches

#### MEDLINE search

| #  | Search History                                                   |
|----|------------------------------------------------------------------|
| 1  | (child: or adolescent or infan:).mp.                             |
| 2  | (online or on-line).tw.                                          |
| 3  | (remote: adj2 consult:).tw.                                      |
| 4  | (web page: or webpage:).tw.                                      |
| 5  | (web-site: or website:).tw.                                      |
| 6  | Answering Services/                                              |
| 7  | cellular phone/                                                  |
| 8  | cyber:.tw.                                                       |
| 9  | discussion list:.tw.                                             |
| 10 | e-bulletin board:.tw.                                            |
| 11 | electron: bulletin board:.tw.                                    |
| 12 | electron: discuss: board:.tw.                                    |
| 13 | electron: mail:.tw.                                              |
| 14 | electronic mail/                                                 |
| 15 | electronic:.tw.                                                  |
| 16 | e-mail:.tw.                                                      |
| 17 | email:.tw.                                                       |
| 18 | exp computer communication networks/                             |
| 19 | exp online systems/                                              |
| 20 | exp computer-assisted instruction/                               |
| 21 | exp diagnosis, computer-assisted/                                |
| 22 | exp therapy, computer-assisted/                                  |
| 23 | exp computers/                                                   |
| 24 | exp medical informatics/                                         |
| 25 | exp computers, handheld/                                         |
| 26 | exp decision making, computer-assisted/                          |
| 27 | exp electronics, medical/                                        |
| 28 | exp internet/                                                    |
| 29 | exp microcomputers/                                              |
| 30 | exp telecommunications/                                          |
| 31 | exp user-computer interface/                                     |
| 32 | (handheld adj2 computer:).tw.                                    |
| 33 | (hand held adj2 computer:).tw.                                   |
| 34 | information highway:.tw.                                         |
| 35 | information superhighway:.tw.                                    |
| 36 | information super highway:.tw.                                   |
| 37 | instant messag:.tw.                                              |
| 38 | text messag:.tw.                                                 |
| 39 | internet:.tw.                                                    |
| 40 | (irc and (internet: or online or on-line or chat: or relay)).tw. |
| 41 | list serv:.tw.                                                   |
| 42 | listserv:.tw.                                                    |
| 43 | mail: list:.tw.                                                  |
| 44 | messaging:.tw.                                                   |
| 45 | Microscopy, Video/                                               |
| 46 | modems/                                                          |

|    |                                                                                                        |
|----|--------------------------------------------------------------------------------------------------------|
| 47 | mobile phone:.tw.                                                                                      |
| 48 | mobilephone:.tw.                                                                                       |
| 49 | mobile telephone:.tw.                                                                                  |
| 50 | mobile telecom:.tw.                                                                                    |
| 51 | mobile communic:.tw.                                                                                   |
| 52 | newsgroup:.tw.                                                                                         |
| 53 | ((pda or pdas) and (comput: or internet: or wireless:)).tw.                                            |
| 54 | personal digital assistant:.tw.                                                                        |
| 55 | pocket pc:.tw.                                                                                         |
| 56 | Radar/                                                                                                 |
| 57 | Radio/                                                                                                 |
| 58 | Remote Consultation/                                                                                   |
| 59 | Satellite Communications/                                                                              |
| 60 | short messag:.tw.                                                                                      |
| 61 | (sms and (internet: or online or on-line or chat: or relay: or wireless:)).tw.                         |
| 62 | exp Software/                                                                                          |
| 63 | tele:.tw.                                                                                              |
| 64 | exp Telecommunications/                                                                                |
| 65 | teleconfer:.tw.                                                                                        |
| 66 | tele-confer:.tw.                                                                                       |
| 67 | teleconsult:.tw.                                                                                       |
| 68 | tele-consult:.tw.                                                                                      |
| 69 | Telefacsimile/                                                                                         |
| 70 | (tele-home: or telehome:).tw.                                                                          |
| 71 | telemed:.tw.                                                                                           |
| 72 | tele-med:.tw.                                                                                          |
| 73 | pocketpc:.tw.                                                                                          |
| 74 | Telemedicine/                                                                                          |
| 75 | exp Telephone/                                                                                         |
| 76 | usenet:.tw.                                                                                            |
| 77 | videoconfer:.tw.                                                                                       |
| 78 | video-confer:.tw.                                                                                      |
| 79 | Videoconferencing/                                                                                     |
| 80 | videophone:.tw.                                                                                        |
| 81 | virtual.tw.                                                                                            |
| 82 | web based:.tw.                                                                                         |
| 83 | webbased:.tw.                                                                                          |
| 84 | world wide web:.tw.                                                                                    |
| 85 | www.tw.                                                                                                |
| 86 | telestroke.mp.                                                                                         |
| 87 | tele-stroke:.mp.                                                                                       |
| 88 | Teleneurology.mp.                                                                                      |
| 89 | tele-neurology.mp.                                                                                     |
| 90 | telehealth:.mp.                                                                                        |
| 91 | tele-health:.mp.                                                                                       |
| 92 | tele-rehab:.mp.                                                                                        |
| 93 | teleservic:.mp.                                                                                        |
| 94 | tele-servic:.mp.                                                                                       |
| 95 | telerehab:.mp.                                                                                         |
| 96 | or/2-95                                                                                                |
| 97 | "delivery of health care"/ or delegation, professional/ or provider-sponsored organizations/ or health |

|     |                                                                                                     |
|-----|-----------------------------------------------------------------------------------------------------|
|     | services accessibility/ or uncompensated care/                                                      |
| 98  | "Referral and Consultation"/                                                                        |
| 99  | consult\$.mp.                                                                                       |
| 100 | Organizational Innovation/                                                                          |
| 101 | exp "diffusion of innovation"/ or technology transfer/                                              |
| 102 | Practice Management, Medical/                                                                       |
| 103 | workflow:.mp.                                                                                       |
| 104 | productivity.mp.                                                                                    |
| 105 | rural:.mp.                                                                                          |
| 106 | communit:.mp.                                                                                       |
| 107 | Primary Health Care/                                                                                |
| 108 | northern territory/                                                                                 |
| 109 | health services, indigenous/                                                                        |
| 110 | exp Primary Health Care/                                                                            |
| 111 | exp Physicians, Family/                                                                             |
| 112 | exp Family Practice/                                                                                |
| 113 | exp Community medicine/                                                                             |
| 114 | exp Group practice/                                                                                 |
| 115 | exp Physician's Practice Patterns/                                                                  |
| 116 | exp Physicians' Offices/                                                                            |
| 117 | exp Practice management, medical/                                                                   |
| 118 | exp Regional medical programs/                                                                      |
| 119 | exp ambulatory care/                                                                                |
| 120 | exp outpatient clinics/                                                                             |
| 121 | exp homes for the aged/                                                                             |
| 122 | home nursing.mp. [mp=title, original title, abstract, name of substance word, subject heading word] |
| 123 | house calls/                                                                                        |
| 124 | house call:.mp.                                                                                     |
| 125 | housecall:.mp.                                                                                      |
| 126 | private practice/                                                                                   |
| 127 | Rural Health Services/                                                                              |
| 128 | Hospitals, Rural/                                                                                   |
| 129 | Rural Health/                                                                                       |
| 130 | Rural Population/                                                                                   |
| 131 | northwest territories/ or nunavut/ or yukon territory/                                              |
| 132 | Arctic Regions/                                                                                     |
| 133 | indians, north american/ or inuits/                                                                 |
| 134 | outpatient:.mp.                                                                                     |
| 135 | out-patient:.mp.                                                                                    |
| 136 | (free-standing adj2 clinic?).mp.                                                                    |
| 137 | (free-standing adj2 facilit:).mp.                                                                   |
| 138 | ambulatory care facilities/                                                                         |
| 139 | community health centers/                                                                           |
| 140 | substance abuse treatment centers/                                                                  |
| 141 | community mental health centers/                                                                    |
| 142 | child guidance clinics/                                                                             |
| 143 | maternal-child health centers/                                                                      |
| 144 | outpatient clinics, hospital/                                                                       |
| 145 | pain clinics/                                                                                       |
| 146 | surgicenters/                                                                                       |
| 147 | exp ambulatory care information systems/                                                            |
| 148 | general practice?.mp.                                                                               |
| 149 | general practitioner?.mp.                                                                           |

|     |                                                      |
|-----|------------------------------------------------------|
| 150 | home care services/                                  |
| 151 | or/97-150                                            |
| 152 | 1 and 96 and 151                                     |
| 153 | limit 152 to yr="1996 - 2008"                        |
| 154 | limit 153 to english                                 |
| 155 | 154 not (letter or editorial or news or comment).pt. |

#### EMBASE search

| #  | Search History                                                                                                                                                                                     |
|----|----------------------------------------------------------------------------------------------------------------------------------------------------------------------------------------------------|
| 1  | (online or on-line).tw.                                                                                                                                                                            |
| 2  | (remote: adj2 consult:).tw.                                                                                                                                                                        |
| 3  | (web page: or webpage:).tw.                                                                                                                                                                        |
| 4  | (web-site: or website:).tw.                                                                                                                                                                        |
| 5  | answering service\$.mp.                                                                                                                                                                            |
| 6  | exp mass communication/                                                                                                                                                                            |
| 7  | cyber:.tw.                                                                                                                                                                                         |
| 8  | discussion list:.tw.                                                                                                                                                                               |
| 9  | e-bulletin board:.tw.                                                                                                                                                                              |
| 10 | electron: bulletin board:.tw.                                                                                                                                                                      |
| 11 | electron: discuss: board:.tw.                                                                                                                                                                      |
| 12 | electron: mail:.tw.                                                                                                                                                                                |
| 13 | electronic:.tw.                                                                                                                                                                                    |
| 14 | e-mail:.tw.                                                                                                                                                                                        |
| 15 | email:.tw.                                                                                                                                                                                         |
| 16 | exp information system/                                                                                                                                                                            |
| 17 | (computer-assisted learning or computer-assisted instruction\$ or computer-assisted education or computer assisted learning or computer assisted instruction\$ or computer assisted education).tw. |
| 18 | computer assisted diagnosis/                                                                                                                                                                       |
| 19 | exp computer assisted therapy/                                                                                                                                                                     |
| 20 | computer/ or microcomputer/ or personal digital assistant/                                                                                                                                         |
| 21 | medical informatics/                                                                                                                                                                               |
| 22 | medical electronic\$.tw.                                                                                                                                                                           |
| 23 | computer interface/                                                                                                                                                                                |
| 24 | (handheld adj2 computer:).tw.                                                                                                                                                                      |
| 25 | (hand held adj2 computer:).tw.                                                                                                                                                                     |
| 26 | information highway:.tw.                                                                                                                                                                           |
| 27 | information superhighway:.tw.                                                                                                                                                                      |
| 28 | information super highway:.tw.                                                                                                                                                                     |
| 29 | instant messag:.tw.                                                                                                                                                                                |
| 30 | text messag:.tw.                                                                                                                                                                                   |
| 31 | internet:.tw.                                                                                                                                                                                      |
| 32 | (irc and (internet: or online or on-line or chat: or relay)).tw.                                                                                                                                   |
| 33 | list serv:.tw.                                                                                                                                                                                     |
| 34 | listserv:.tw.                                                                                                                                                                                      |
| 35 | mail: list:.tw.                                                                                                                                                                                    |
| 36 | messaging:.tw.                                                                                                                                                                                     |
| 37 | mobile phone:.tw.                                                                                                                                                                                  |
| 38 | mobilephone:.tw.                                                                                                                                                                                   |
| 39 | mobile telephone:.tw.                                                                                                                                                                              |

|    |                                                                                |
|----|--------------------------------------------------------------------------------|
| 40 | mobile telecom:.tw.                                                            |
| 41 | mobile communic:.tw.                                                           |
| 42 | newsgroup:.tw.                                                                 |
| 43 | ((pda or pdas) and (comput: or internet: or wireless:)).tw.                    |
| 44 | personal digital assistant:.tw.                                                |
| 45 | pocket pc:.tw.                                                                 |
| 46 | pocketpc:.tw.                                                                  |
| 47 | short messag:.tw.                                                              |
| 48 | (sms and (internet: or online or on-line or chat: or relay: or wireless:)).tw. |
| 49 | exp computer program/                                                          |
| 50 | tele:.tw.                                                                      |
| 51 | teleconfer:.tw.                                                                |
| 52 | tele-confer:.tw.                                                               |
| 53 | teleconsult:.tw.                                                               |
| 54 | tele-consult:.tw.                                                              |
| 55 | (tele-home: or telehome:).tw.                                                  |
| 56 | telemed:.tw.                                                                   |
| 57 | tele-med:.tw.                                                                  |
| 58 | usenet:.tw.                                                                    |
| 59 | videoconfer:.tw.                                                               |
| 60 | video-confer:.tw.                                                              |
| 61 | videophone:.tw.                                                                |
| 62 | virtual.tw.                                                                    |
| 63 | web based:.tw.                                                                 |
| 64 | webbased:.tw.                                                                  |
| 65 | world wide web:.tw.                                                            |
| 66 | www.tw.                                                                        |
| 67 | telestroke.mp.                                                                 |
| 68 | tele-stroke:.mp.                                                               |
| 69 | Teleneurology.mp.                                                              |
| 70 | tele-neurology.mp.                                                             |
| 71 | telehealth:.mp.                                                                |
| 72 | tele-health:.mp.                                                               |
| 73 | telerehab:.mp.                                                                 |
| 74 | tele-rehab:.mp.                                                                |
| 75 | teleservic:.mp.                                                                |
| 76 | tele-servic:.mp.                                                               |
| 77 | or/1-76                                                                        |
| 78 | exp Health Care Delivery/ or Professional Delegation/                          |
| 79 | exp Patient Referral/                                                          |
| 80 | consult\$.mp.                                                                  |
| 81 | exp Organization/                                                              |
| 82 | (diffusion of innovation or "technology transfer").tw.                         |
| 83 | management/                                                                    |
| 84 | workflow:.mp.                                                                  |
| 85 | productivity.mp.                                                               |
| 86 | rural:.mp.                                                                     |
| 87 | communit:.mp.                                                                  |
| 88 | indigenous health services.mp.                                                 |
| 89 | exp general practitioner/                                                      |
| 90 | exp community medicine/                                                        |
| 91 | Physician's Practice Patterns.mp.                                              |

|     |                                                                                                                                                                                                                                                                                                                                                                                                                                                                                                          |
|-----|----------------------------------------------------------------------------------------------------------------------------------------------------------------------------------------------------------------------------------------------------------------------------------------------------------------------------------------------------------------------------------------------------------------------------------------------------------------------------------------------------------|
| 92  | Physicians' Offices.mp. or Health Care Facility/                                                                                                                                                                                                                                                                                                                                                                                                                                                         |
| 93  | exp Home for the Aged/                                                                                                                                                                                                                                                                                                                                                                                                                                                                                   |
| 94  | exp Professional Practice/                                                                                                                                                                                                                                                                                                                                                                                                                                                                               |
| 95  | house call:.mp.                                                                                                                                                                                                                                                                                                                                                                                                                                                                                          |
| 96  | housecall:.mp.                                                                                                                                                                                                                                                                                                                                                                                                                                                                                           |
| 97  | exp Rural Health Care/                                                                                                                                                                                                                                                                                                                                                                                                                                                                                   |
| 98  | exp Rural Health Nursing/                                                                                                                                                                                                                                                                                                                                                                                                                                                                                |
| 99  | exp Rural Population/                                                                                                                                                                                                                                                                                                                                                                                                                                                                                    |
| 100 | (northwest territories or nunavut or yukon).mp.                                                                                                                                                                                                                                                                                                                                                                                                                                                          |
| 101 | exp Arctic/                                                                                                                                                                                                                                                                                                                                                                                                                                                                                              |
| 102 | exp american indian/ or exp eskimo/                                                                                                                                                                                                                                                                                                                                                                                                                                                                      |
| 103 | outpatient:.mp.                                                                                                                                                                                                                                                                                                                                                                                                                                                                                          |
| 104 | out-patient:.mp.                                                                                                                                                                                                                                                                                                                                                                                                                                                                                         |
| 105 | (free-standing adj2 clinic?).mp.                                                                                                                                                                                                                                                                                                                                                                                                                                                                         |
| 106 | (free-standing adj2 facilit:).mp.                                                                                                                                                                                                                                                                                                                                                                                                                                                                        |
| 107 | exp Health Center/                                                                                                                                                                                                                                                                                                                                                                                                                                                                                       |
| 108 | exp Drug Dependence Treatment/                                                                                                                                                                                                                                                                                                                                                                                                                                                                           |
| 109 | exp Community Mental Health Center/                                                                                                                                                                                                                                                                                                                                                                                                                                                                      |
| 110 | child guidance clinic\$.mp.                                                                                                                                                                                                                                                                                                                                                                                                                                                                              |
| 111 | exp Pain Clinic/                                                                                                                                                                                                                                                                                                                                                                                                                                                                                         |
| 112 | exp Hospital Information System/                                                                                                                                                                                                                                                                                                                                                                                                                                                                         |
| 113 | general practice?.mp.                                                                                                                                                                                                                                                                                                                                                                                                                                                                                    |
| 114 | general practitioner?.mp.                                                                                                                                                                                                                                                                                                                                                                                                                                                                                |
| 115 | medical care/ or clinical decision making/ or doctor<br>patient relation/ or general practice/ or medical<br>decision making/ or primary medical care/ or private<br>practice/                                                                                                                                                                                                                                                                                                                           |
| 116 | patient care/ or "bladder and bowel management"/ or<br>breast care/ or case finding/ or case management/ or<br>catheter care/ or cultural safety/ or eye care/ or foot<br>care/ or gynecologic care/ or holistic care/ or patient<br>assessment/ or patient care planning/ or patient<br>decision making/ or patient positioning/ or patient<br>scheduling/ or perineal care/ or peroperative care/ or<br>postanesthesia care/ or rehabilitation care/ or<br>urological care/ or exp patient monitoring/ |
| 117 | or/78-116                                                                                                                                                                                                                                                                                                                                                                                                                                                                                                |
| 118 | 77 and 117                                                                                                                                                                                                                                                                                                                                                                                                                                                                                               |
| 119 | child:.mp.                                                                                                                                                                                                                                                                                                                                                                                                                                                                                               |
| 120 | adolescent.mp.                                                                                                                                                                                                                                                                                                                                                                                                                                                                                           |
| 121 | infan:.mp.                                                                                                                                                                                                                                                                                                                                                                                                                                                                                               |
| 122 | exp pediatrics/                                                                                                                                                                                                                                                                                                                                                                                                                                                                                          |
| 123 | or/119-122                                                                                                                                                                                                                                                                                                                                                                                                                                                                                               |
| 124 | 118 and 123                                                                                                                                                                                                                                                                                                                                                                                                                                                                                              |
| 125 | limit 124 to yr="1996 - 2008"                                                                                                                                                                                                                                                                                                                                                                                                                                                                            |
| 126 | limit 125 to english                                                                                                                                                                                                                                                                                                                                                                                                                                                                                     |
| 127 | 126 not (letter or editorial or news or comment).pt.                                                                                                                                                                                                                                                                                                                                                                                                                                                     |

CINAHL search

| # | Search History              |
|---|-----------------------------|
| 1 | (online or on-line).tw.     |
| 2 | (remote: adj2 consult:).tw. |
| 3 | (web page: or webpage:).tw. |

|    |                                                                                |
|----|--------------------------------------------------------------------------------|
| 4  | (web-site: or website:).tw.                                                    |
| 5  | answering service\$.mp.                                                        |
| 6  | exp informatics/                                                               |
| 7  | cyber:.tw.                                                                     |
| 8  | discussion list:.tw.                                                           |
| 9  | e-bulletin board:.tw.                                                          |
| 10 | electron: bulletin board:.tw.                                                  |
| 11 | electron: discuss: board:.tw.                                                  |
| 12 | electron: mail:.tw.                                                            |
| 13 | electronic:.tw.                                                                |
| 14 | e-mail:.tw.                                                                    |
| 15 | email:.tw.                                                                     |
| 16 | exp teaching methods/                                                          |
| 17 | (handheld adj2 computer:).tw.                                                  |
| 18 | (hand held adj2 computer:).tw.                                                 |
| 19 | information highway:.tw.                                                       |
| 20 | information superhighway:.tw.                                                  |
| 21 | information super highway:.tw.                                                 |
| 22 | instant messag:.tw.                                                            |
| 23 | text messag:.tw.                                                               |
| 24 | internet:.tw.                                                                  |
| 25 | (irc and (internet: or online or on-line or chat: or relay)).tw.               |
| 26 | list serv:.tw.                                                                 |
| 27 | listserv:.tw.                                                                  |
| 28 | mail: list:.tw.                                                                |
| 29 | messaging:.tw.                                                                 |
| 30 | (video microscop\$ or video-microsop\$).tw.                                    |
| 31 | mobile phone:.tw.                                                              |
| 32 | mobilephone:.tw.                                                               |
| 33 | mobile telephone:.tw.                                                          |
| 34 | mobile telecom:.tw.                                                            |
| 35 | mobile communic:.tw.                                                           |
| 36 | newsgroup:.tw.                                                                 |
| 37 | ((pda or pdas) and (comput: or internet: or wireless:)).tw.                    |
| 38 | personal digital assistant:.tw.                                                |
| 39 | pocket pc:.tw.                                                                 |
| 40 | pocketpc:.tw.                                                                  |
| 41 | radar.tw.                                                                      |
| 42 | short messag:.tw.                                                              |
| 43 | (sms and (internet: or online or on-line or chat: or relay: or wireless:)).tw. |
| 44 | tele:.tw.                                                                      |
| 45 | exp Telecommunications/                                                        |
| 46 | teleconfer:.tw.                                                                |
| 47 | tele-confer:.tw.                                                               |
| 48 | teleconsult:.tw.                                                               |
| 49 | tele-consult:.tw.                                                              |
| 50 | (tele-home: or telehome:).tw.                                                  |
| 51 | telemed:.tw.                                                                   |
| 52 | tele-med:.tw.                                                                  |
| 53 | usenet:.tw.                                                                    |
| 54 | videoconfer:.tw.                                                               |
| 55 | video-confer:.tw.                                                              |
| 56 | videophone:.tw.                                                                |

|     |                                                                                                                                                                                                                      |
|-----|----------------------------------------------------------------------------------------------------------------------------------------------------------------------------------------------------------------------|
| 57  | virtual.tw.                                                                                                                                                                                                          |
| 58  | web based:.tw.                                                                                                                                                                                                       |
| 59  | webbased:.tw.                                                                                                                                                                                                        |
| 60  | world wide web:.tw.                                                                                                                                                                                                  |
| 61  | www.tw.                                                                                                                                                                                                              |
| 62  | telestroke.mp.                                                                                                                                                                                                       |
| 63  | tele-stroke:.mp.                                                                                                                                                                                                     |
| 64  | Teleneurology.mp.                                                                                                                                                                                                    |
| 65  | tele-neurology.mp.                                                                                                                                                                                                   |
| 66  | telehealth:.mp.                                                                                                                                                                                                      |
| 67  | tele-health:.mp.                                                                                                                                                                                                     |
| 68  | telerehab:.mp.                                                                                                                                                                                                       |
| 69  | tele-rehab:.mp.                                                                                                                                                                                                      |
| 70  | teleservic:.mp.                                                                                                                                                                                                      |
| 71  | tele-servic:.mp.                                                                                                                                                                                                     |
| 72  | or/1-71                                                                                                                                                                                                              |
| 73  | exp Health Care Delivery/ or professional delegation.mp.<br>or exp Provider-Sponsored Organizations/ or exp Health<br>Services Accessibility/ or exp Uncompensated Care/                                             |
| 74  | exp "Referral and Consultation"/                                                                                                                                                                                     |
| 75  | consult\$.mp.                                                                                                                                                                                                        |
| 76  | exp Organizational Culture/ or exp Organizational<br>Change/                                                                                                                                                         |
| 77  | exp "Diffusion of Innovation"/ or exp Product Evaluation/<br>or exp Product Development/ or exp Equipment Design/<br>or exp Assistive Technology/ or technology transfer.mp.<br>or exp Assistive Technology Devices/ |
| 78  | exp Private Practice Management/                                                                                                                                                                                     |
| 79  | workflow:.mp.                                                                                                                                                                                                        |
| 80  | productivity.mp.                                                                                                                                                                                                     |
| 81  | rural:.mp.                                                                                                                                                                                                           |
| 82  | communit:.mp.                                                                                                                                                                                                        |
| 83  | exp Northern Territory/                                                                                                                                                                                              |
| 84  | exp Health Services, Indigenous/                                                                                                                                                                                     |
| 85  | exp Physicians, Family/                                                                                                                                                                                              |
| 86  | exp Family Practice/                                                                                                                                                                                                 |
| 87  | exp Community Health Services/                                                                                                                                                                                       |
| 88  | exp Group Practice/                                                                                                                                                                                                  |
| 89  | Physician's Practice Patterns.mp.                                                                                                                                                                                    |
| 90  | exp Practitioner's Office/                                                                                                                                                                                           |
| 91  | Regional medical programs.mp.                                                                                                                                                                                        |
| 92  | exp Ambulatory Care/                                                                                                                                                                                                 |
| 93  | exp Outpatient Service/                                                                                                                                                                                              |
| 94  | exp Nursing Homes/                                                                                                                                                                                                   |
| 95  | exp Home Nursing/                                                                                                                                                                                                    |
| 96  | exp Home Health Care/                                                                                                                                                                                                |
| 97  | house call:.mp.                                                                                                                                                                                                      |
| 98  | housecall:.mp.                                                                                                                                                                                                       |
| 99  | exp Private Practice/                                                                                                                                                                                                |
| 100 | exp Rural Health Services/                                                                                                                                                                                           |
| 101 | exp Hospitals, Rural/                                                                                                                                                                                                |
| 102 | exp Rural Health/                                                                                                                                                                                                    |
| 103 | exp Rural Areas/                                                                                                                                                                                                     |
| 104 | exp northwest territories/ or exp nunavut/ or exp yukon                                                                                                                                                              |

|     |                                                      |
|-----|------------------------------------------------------|
|     | territory/                                           |
| 105 | exp arctic regions/                                  |
| 106 | exp eskimos/ or exp native americans/                |
| 107 | outpatient:.mp.                                      |
| 108 | out-patient:.mp.                                     |
| 109 | (free-standing adj2 clinic?).mp.                     |
| 110 | (free-standing adj2 facilit:).mp.                    |
| 111 | exp Ambulatory Care Facilities/                      |
| 112 | exp Community Health Centers/                        |
| 113 | exp "Substance Use Rehabilitation Programs"/         |
| 114 | exp Community Mental Health Services/                |
| 115 | child guidance clinics.mp.                           |
| 116 | maternal-child health centers.mp.                    |
| 117 | exp ambulatory care information systems/             |
| 118 | general practice?.mp.                                |
| 119 | general practitioner?.mp.                            |
| 120 | or/74-119                                            |
| 121 | 73 and 120                                           |
| 122 | child:.mp.                                           |
| 123 | adolescent.mp.                                       |
| 124 | infan:.mp.                                           |
| 125 | or/122-124                                           |
| 126 | 121 and 125                                          |
| 127 | limit 126 to yr="1996 - 2008"                        |
| 128 | limit 127 to english                                 |
| 129 | 128 not (letter or editorial or news or comment).pt. |
